# Supplementary material
Source: PubMed Central journal article supplement (PMC7338031)
Supplement: mmc2.pdf [file mmc2.pdf]

Figura A.1 Aspectos básicos para una adecuada implementación de la telemedicina.

## APENDIX

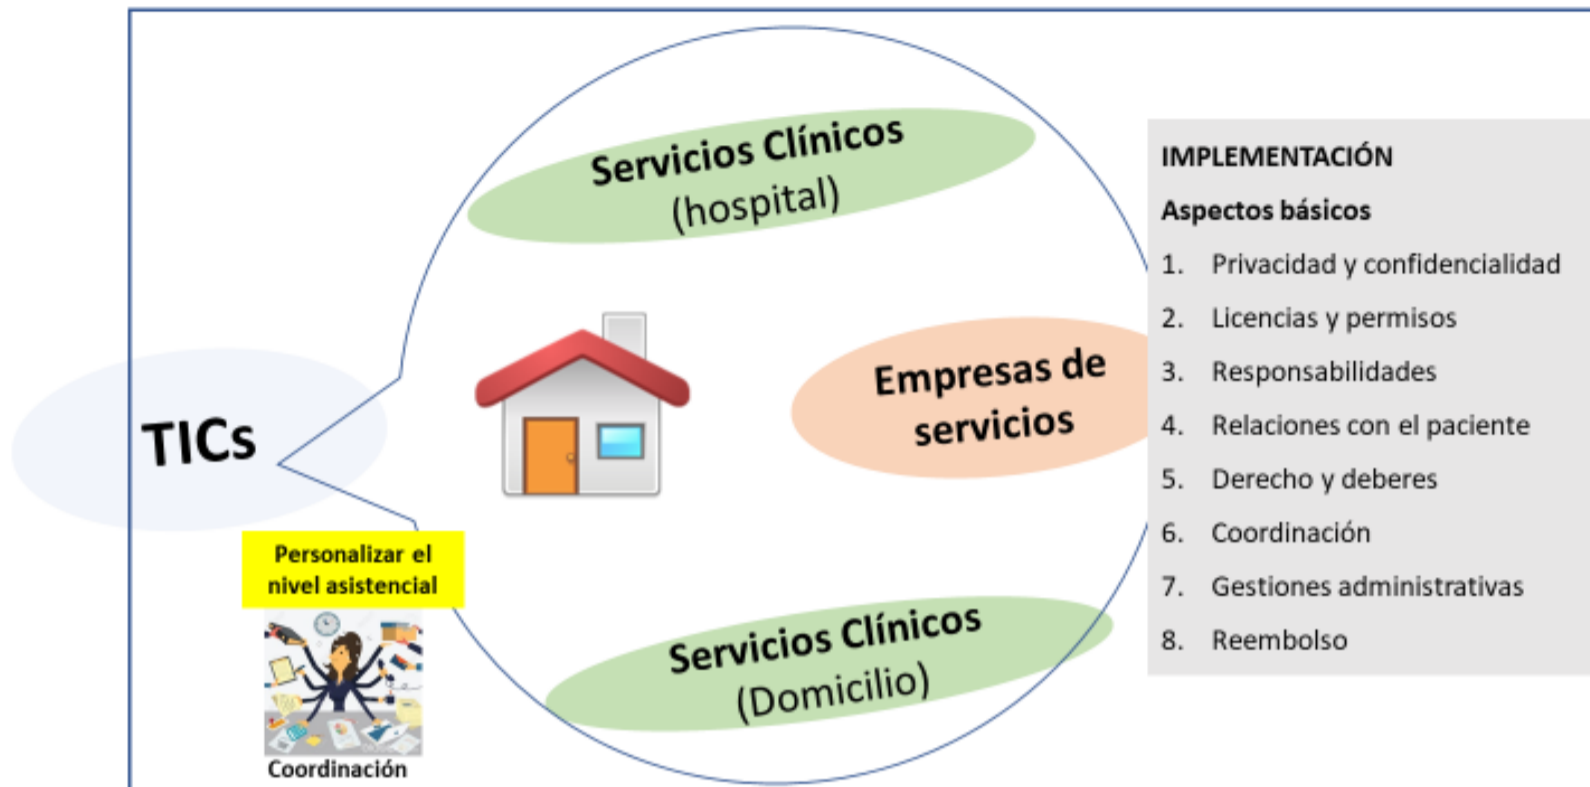

Figura A.1

Figura A.2 Trabajo en red teniendo en cuenta todos los niveles asistenciales en un contexto de aplicación de la telemedicina.

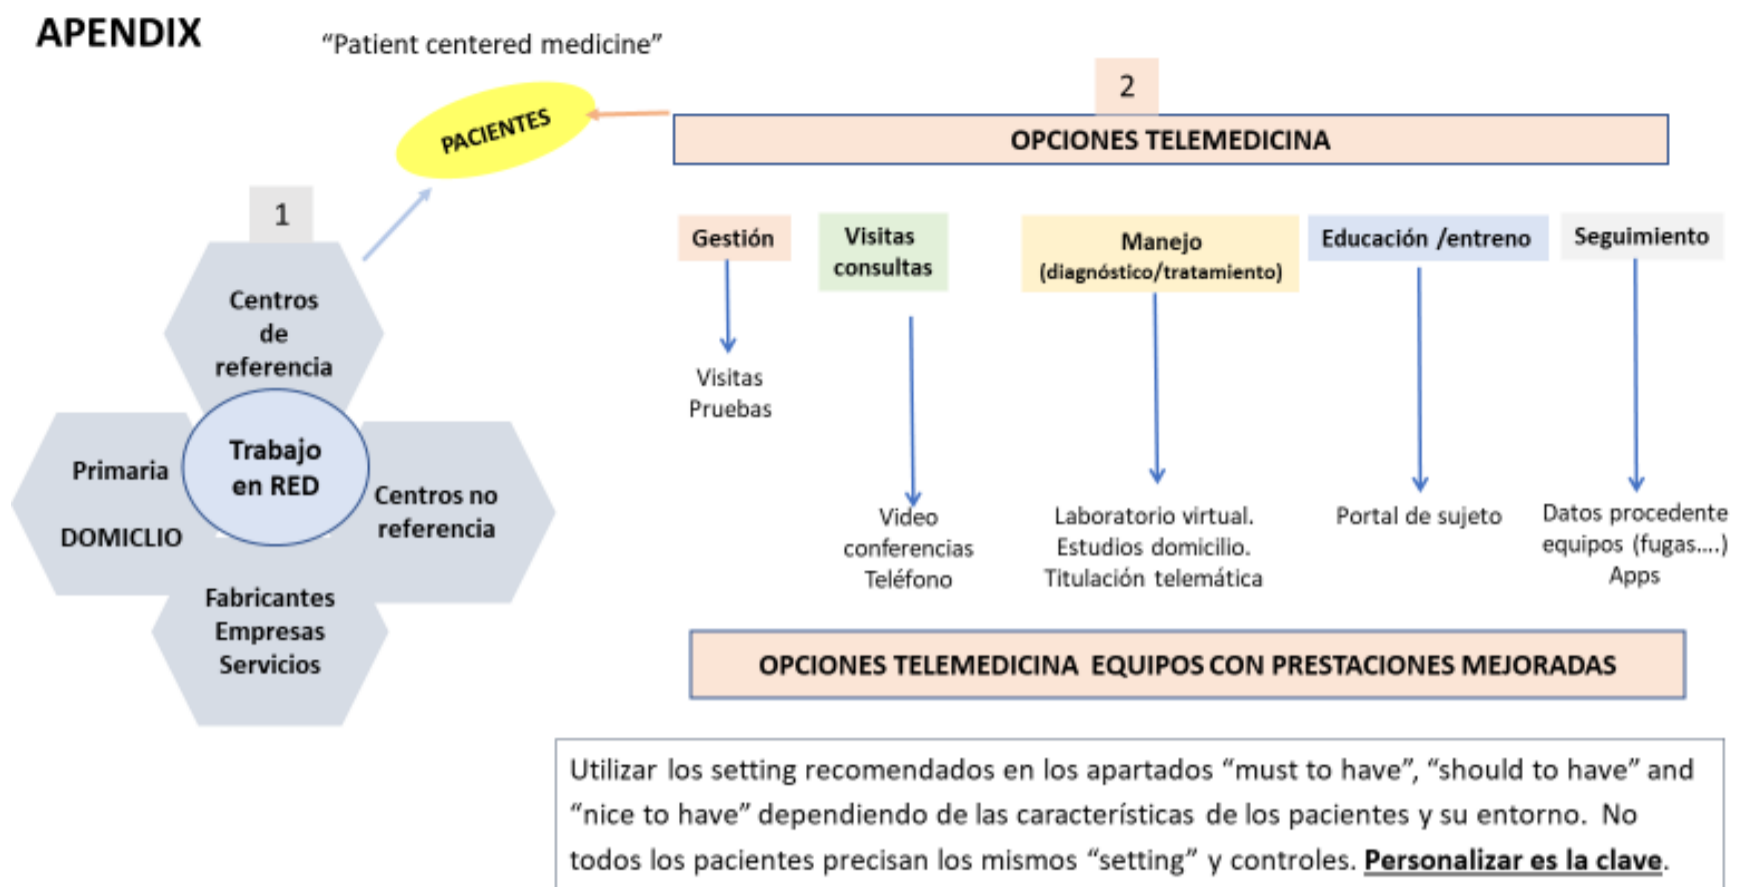

Figura A.2

Figura A.3. Ejemplo de nuevas posibilidades técnicas para el diagnóstico de pacientes a través de múltiples y simples sensores repartidos por la superficie corporal (ref 52). With permission AAAS journal. Han et al. Battery-free, wireless sensors for full-body pressure and temperature mapping S. *Sci. Transl. Med.* 2018.

## APENDIX

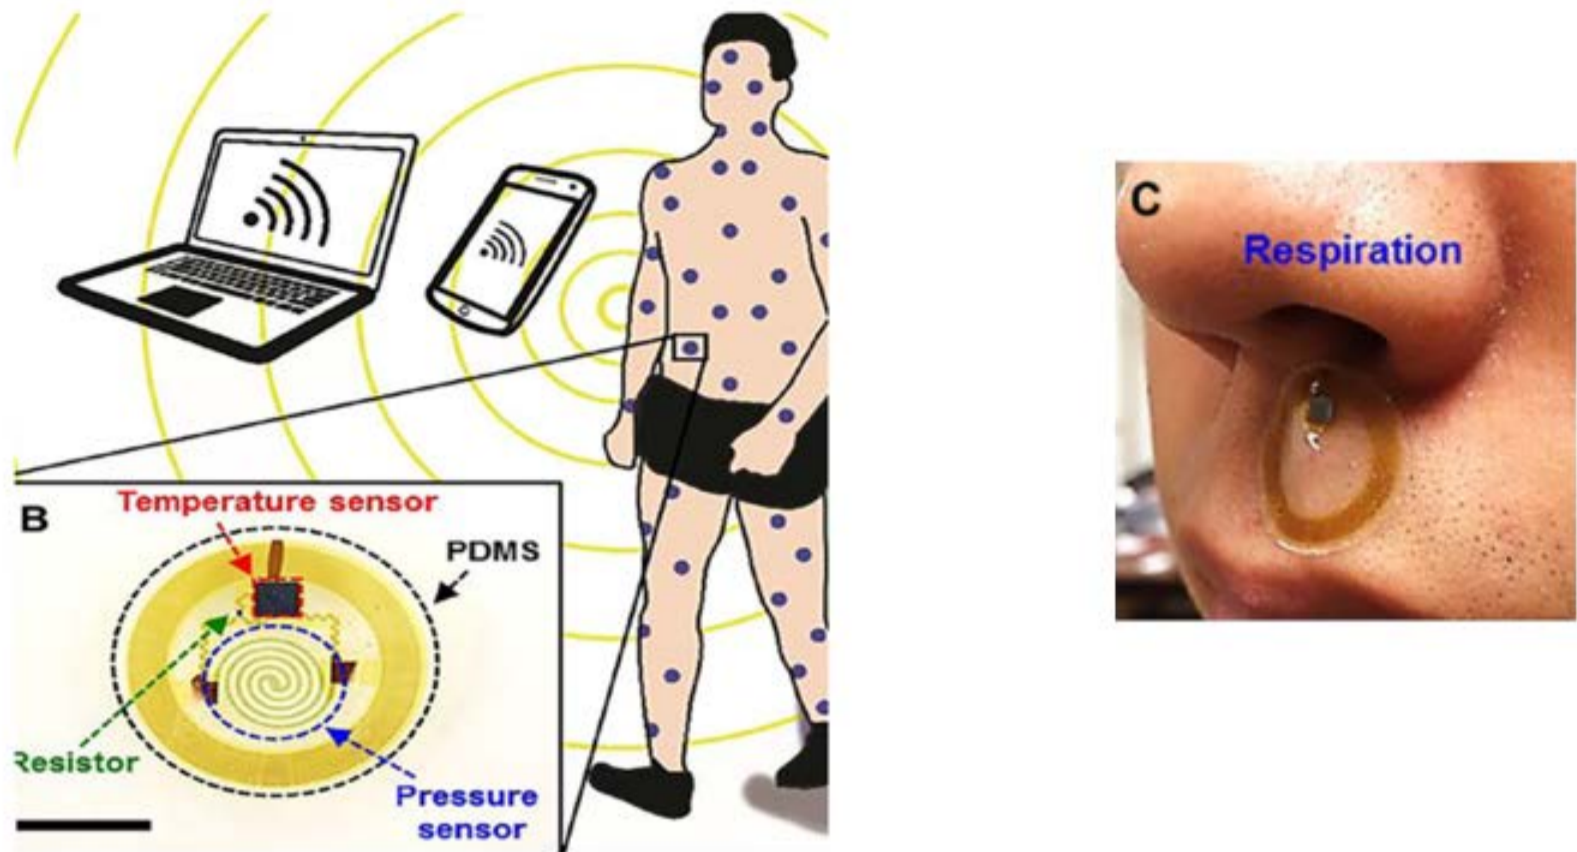

Figura A.3
